# Supplementary material for: Dissolvable films of silk fibroin for ultrathin conformal bio-integrated electronics
Source: Springer Nature journal article supplement (doi:10.1038/nmat2745), 2010-04-18
Supplement: nmat2745-s1.pdf [file nmat2745-s1.pdf]

Browse Articles
| Nature Materials


Skip to main content

Thank you for visiting nature.com. You are using a browser version with limited support for CSS. To obtain
the best experience, we recommend you use a more up to date browser (or turn off compatibility mode in
Internet Explorer). In the meantime, to ensure continued support, we are displaying the site without styles
and JavaScript.

Advertisement


- View all journals
- Search
- Log in

- Explore content
- About the journal
- Publish with us

- Sign up for alerts
- RSS feed


1. nature
2. nature materials
3. browse articles

# Browse Articles

## Filter By:

Article Type

All

- All
- Article (1905)
- Author Correction (53)
- Comment (38)
- Commentary (136)
- Correspondence (64)
- Corrigendum (51)
- Editorial (267)
- Erratum (42)
- Feature (29)
- Interview (52)
- Letter (1115)
- Milestones (23)
- News & Views (1597)
- Perspective (39)
- Progress Article (31)
- Publisher Correction (43)
- Research Briefing (24)
- Research Highlights (328)
- Research News (50)
- Review Article (154)

Year

All

- All
- 2024 (127)
- 2023 (299)
- 2022 (276)
- 2021 (307)
- 2020 (290)
- 2019 (306)
- 2018 (275)
- 2017 (222)
- 2016 (302)
- 2015 (336)
- 2014 (334)
- 2013 (302)
- 2012 (311)
- 2011 (279)
- 2010 (290)
- 2009 (253)
- 2008 (252)
- 2007 (272)
- 2006 (255)
- 2005 (246)

- ### Nano-oxides boost aluminium heat resistance

  Adding homogeneously dispersed oxide nanoparticles to aluminium pushes its high-temperature strength up to 500 °C.

  - Alexis Deschamps

  News & Views26 Apr 2024
- ### Injectable and retrievable soft electronics

  Liquid bioelectronics based on a permanent fluidic magnet made from three-dimensional assembled magnetic colloidal particles can be injected into the surface of the heart for cardiovascular monitoring and subsequently retrieved after use.

  - Jiahong Li
  - Yadong Xu
  - Wei Gao

  News & Views26 Apr 2024
- ### Synergistic work hardening by rapid multiplication of dislocations in a multi-principal-element alloy

  In a multi-principal-element VCoNi alloy, premature necking during Lüders banding has been harnessed to produce rapid dislocation multiplication, leading to both forest hardening and hardening induced by regions of local chemical order. The result is ductility of 20% and a yield strength of 2 GPa, during room-temperature and cryogenic deformation.

  Research Briefing26 Apr 2024
- ### Permanent fluidic magnets for liquid bioelectronics

  The magnetism-mediated assembly of non-Brownian magnetic colloidal particles into a three-dimensional oriented and ramified magnetic network yields permanent fluidic magnets that are used in a self-powered, liquid-based wireless cardiovascular sensor.

  - Xun Zhao
  - Yihao Zhou
  - Jun Chen

  Article26 Apr 2024
- ### Plutonium oxide melt structure and covalency

  The molten structure of plutonium oxide—a component of mixed oxide nuclear fuels—is measured, showing some degree of covalent bonding. Its atomic structure is similar to that of cerium oxide, which could be a non-radioactive structural surrogate.

  - Stephen K. Wilke
  - Chris J. Benmore
  - Richard Weber

  Article26 Apr 2024
- ### Electrochemically actuated microelectrodes for minimally invasive peripheral nerve interfaces

  Electrode arrays for neurological diagnosis and treatment carry a risk of nerve injury. Nerve cuffs with tiny voltage-controlled shape-reconfigurable electrode arrays have been reported, allowing active wrapping around delicate nerves.

  - Chaoqun Dong
  - Alejandro Carnicer-Lombarte
  - George G. Malliaras

  ArticleOpen Access26 Apr 2024
- ### Heat-resistant super-dispersed oxide strengthened aluminium alloys

  An interface modification strategy has been developed to uniformly distribute high-density sub-10 nm coherent MgO particles in an Al matrix, resulting in high strength and creep resistance at temperatures up to 500 °C.

  - Xiangren Bai
  - Haonan Xie
  - Chunnian He

  Article26 Apr 2024
- ### On-device phase engineering

  A strategy of on-device phase engineering of two-dimensional materials is proposed, allowing the in situ realization of various lattice phases with distinct stoichiometries and versatile functions.

  - Xiaowei Liu
  - Junjie Shan
  - Feng Miao

  Article25 Apr 2024
- ### Evolution of the flat band and the role of lattice relaxations in twisted bilayer graphene

  By combining nano-spot angle-resolved photoemission spectroscopy and atomic force microscopy, the authors resolve the fine electronic structure of the flat band and remote bands of twisted bilayer graphene as the twist angle varies, revealing a spectral weight transfer between remote bands that is attributed to lattice relaxations.

  - Qian Li
  - Hongyun Zhang
  - Shuyun Zhou

  Article24 Apr 2024
- ### Elementary excitations of single-photon emitters in hexagonal boron nitride

  Combining resonant inelastic X-ray scattering and photoluminescence spectroscopy, an elementary excitation in hexagonal-boron-nitride-based single-photon emitters has been demonstrated, giving rise to multiple regular harmonics that can explain the wide frequency range of these emitters.

  - Jonathan Pelliciari
  - Enrique Mejia
  - Gabriele Grosso

  Article23 Apr 2024
- ### Observation of giant non-reciprocal charge transport from quantum Hall states in a topological insulator

  The authors report diode-like resistance in a non-magnetic topological insulator in the quantum Hall regime.

  - Chunfeng Li
  - Rui Wang
  - Fengqi Song

  Article19 Apr 2024
- ### Understanding asymmetric switching times in accumulation mode organic electrochemical transistors

  The turn-off time is generally faster than the turn-on time in accumulation mode organic electrochemical transistors (OECTs), but the mechanism is less understood. Here the authors find different transient behaviours of turn-on and turn-off in accumulation mode OECTs, and ion transport is the limiting factor of device kinetics.

  - Jiajie Guo
  - Shinya E. Chen
  - David S. Ginger

  Article17 Apr 2024
- ### Uncovering the predictive pathways of lithium and sodium interchange in layered oxides

  Ion exchange is a powerful method to access metastable materials for energy storage, but identifying lithium and sodium interchange in layered oxides remains challenging. Using such model materials, vacancy level and corresponding lithium preference are shown to be crucial for ion exchange pathway accessibility.

  - Yu Han
  - Weihang Xie
  - Chong Liu

  Article16 Apr 2024
- ### Manipulating chiral spin transport with ferroelectric polarization

  The authors report a modulation of the magnon spin current by electric polarization reversal.

  - Xiaoxi Huang
  - Xianzhe Chen
  - Ramamoorthy Ramesh

  Article15 Apr 2024
- ### Experimental observation of current-driven antiskyrmion sliding in stripe domains

  Electric current pulses are used to move antiskyrmions, by coupling them with a helical track.

  - Zhidong He
  - Zhuolin Li
  - Baogen Shen

  Article11 Apr 2024
- ### Harnessing instability for work hardening in multi-principal element alloys

  Harnessing premature necking produces a rapid multiplication of dislocations to interact with local chemical orders for work hardening in VCoNi alloy, achieving ductility of 20% and yield strength of 2 GPa during room-temperature and cryogenic deformation.

  - Bowen Xu
  - Huichao Duan
  - Xiaolei Wu

  ArticleOpen Access11 Apr 2024
- ### A correlated ferromagnetic polar metal by design

  The authors report coexisting ferromagnetism, polar distortion and metallicity in quasi-two-dimensional Ca3Co3O8, providing a platform to exploit magnetoelectric coupling in a metallic system.

  - Jianbing Zhang
  - Shengchun Shen
  - Pu Yu

  Article11 Apr 2024
- ### Drift-free iontronic sensing enabled by a creep-free polyelectrolyte elastomer

  Soft pressure sensors drift under prolonged high stress because of the creep of soft materials, which causes inaccurate measurements. Now, through molecular-level design, a leakage-free and creep-free polyelectrolyte elastomer is synthesized, and an iontronic sensor using the polyelectrolyte elastomer shows very low signal drift under a high static pressure.

  Research Briefing10 Apr 2024
- ### A DNA origami device spatially controls CD95 signalling to induce immune tolerance in rheumatoid arthritis

  A pH-responsive DNA origami device displays a precise geometric array of CD95 ligands to selectively induce activated immune cell death and elicit localized immune tolerance to alleviate rheumatoid arthritis.

  - Ling Li
  - Jue Yin
  - Xiaoyuan Chen

  Article09 Apr 2024
- ### Solution-phase sample-averaged single-particle spectroscopy of quantum emitters with femtosecond resolution

  Combining fluorescence correlation spectroscopy and ultrafast spectroscopy, the sample-averaged dynamics of defects are studied with single-particle sensitivity in two-dimensional hexagonal boron nitride heterogeneous emitters.

  - Jiaojian Shi
  - Yuejun Shen
  - Aaron M. Lindenberg

  Article08 Apr 2024

- Previous page
- page 1
- page 2
- page 3
- …
- page 307
- Next page

## Explore content

- Research articles
- Reviews & Analysis
- News & Comment
- Current issue
- Collections
- Subjects

- Follow us on Facebook
- Follow us on Twitter
- Sign up for alerts
- RSS feed


## About the journal

- Aims & Scope
- Our publishing models
- Journal Information
- Journal Metrics
- About the Editors
- Research Cross-Journal Editorial Team
- Reviews Cross-Journal Editorial Team
- Editorial Values Statement
- Editorial Policies
- Content Types
- Web Feeds
- Contact


## Publish with us

- Submission Guidelines
- For Reviewers
- Language editing services
- Submit manuscript

## Search

Search articles by subject, keyword or author

Show results from

All journals
This journal

Search

Advanced search

### Quick links

- Explore articles by subject
- Find a job
- Guide to authors
- Editorial policies

Nature Materials (*Nat. Mater.*)

ISSN 1476-4660 (online)

ISSN 1476-1122 (print)

## nature.com sitemap

### About Nature Portfolio

- About us
- Press releases
- Press office
- Contact us

### Discover content

- Journals A-Z
- Articles by subject
- protocols.io
- Nature Index

### Publishing policies

- Nature portfolio policies
- Open access

### Author & Researcher services

- Reprints & permissions
- Research data
- Language editing
- Scientific editing
- Nature Masterclasses
- Research Solutions

### Libraries & institutions

- Librarian service & tools
- Librarian portal
- Open research
- Recommend to library

### Advertising & partnerships

- Advertising
- Partnerships & Services
- Media kits
- Branded
  content

### Professional development

- Nature Careers
- Nature 
  Conferences

### Regional websites

- Nature Africa
- Nature China
- Nature India
- Nature Italy
- Nature Japan
- Nature Middle East

- Privacy
  Policy
- Use
  of cookies
- Your privacy choices/Manage cookies
- Legal
  notice
- Accessibility
  statement
- Terms & Conditions
- Your US state privacy rights

© 2024 Springer Nature Limited

xml version="1.0" encoding="UTF-8"?
